# Supplementary material for: Regulation of KIR3DL3 Expression via miRNA
Source: PubMed Central journal article supplement (PMC6723774; doi:10.3390/genes10080603), 2019-08-09
Supplement: genes-10-00603-s001.pdf [file genes-10-00603-s001.pdf]

## Supplementary materials and methods

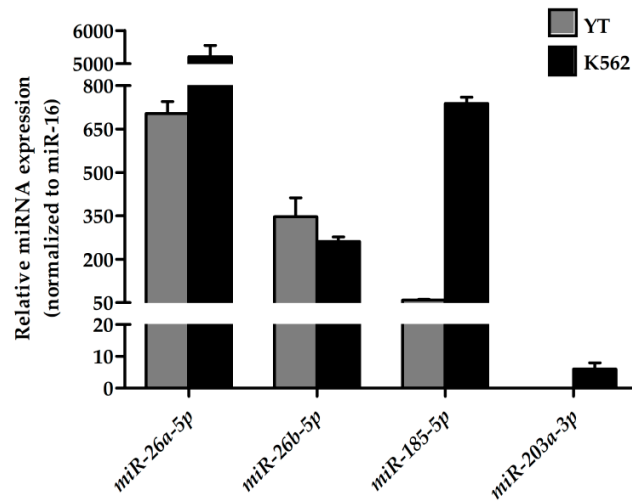

**Figure S1.** Endogenous miRNA expression levels in the YT and K562 cell lines. Relative candidate miRNA expressions in YT and K562 are presented. The expression of miR-203a-3p was not detected in YT but very small amount was present in K562.

**Table S1.** Primer sets for KIR3DL3 and miRNA detection.

| Primer name                                                          | Primer Sequences 5'-3'                                                      |
|----------------------------------------------------------------------|-----------------------------------------------------------------------------|
| <b>Specific primers for <i>qRT-PCR</i> of the genes investigated</b> |                                                                             |
| 2DL4                                                                 | F: TCAGGACAAGCCCTTCTGC<br>R: GACAGGGACCCCATCTTTC                            |
| 3DL1                                                                 | F: TGAGCACTTCTTTCTGCACAA<br>R: TAGGTCCCTGCAAGGGCAA                          |
| 3DL3                                                                 | F: GCAATGTTGGTCAGATGTCAG<br>R: AGCCGACAACATCATAGGGTA                        |
| RPII                                                                 | F: AGTATGGCATGGAGATCCCC<br>R: ATAGGCAGGGGTTGCACC                            |
| <b>Primer set for 3'UTR KIR3DL3 mutagenesis</b>                      |                                                                             |
| 3'UTRWT                                                              | F: CACCGGATCCCACGGAACCTTCCAAATGCTGAGCG<br>R: CACCCTCGAGATGAGGGCAGACATGTTTAC |
| Mu_miR-26a/b-5p (295)                                                | F: TCCATTTACCTAACCCCTGCC<br>R: GGCAGGGGTTAGGTGAAATGGA                       |
| Mu_miR-26a/b-5p (344)                                                | F: TCCTAGTCTGCTTAAGGCTGCGAT<br>R: ATCGCAGCCTTAAGCAGACTAGGA                  |
| Mu_185-5p                                                            | F: CTGCCACCTATCGAACCTAACT<br>R: AGTTAGGTTTCGATAGGTGGGCAG                    |
| Mu_203a-3p                                                           | F: CAATTCTCCAGTACACTTGACCCC<br>R: GGGTCAAGTGTACTGGAGAATTG                   |
| <b>Stem-loop primer set for miRNA detection</b>                      |                                                                             |
| S-hsa-miR-26a-5p                                                     | S: GTCGTATCCAGTGCAGGGTCCGAGGTATTCGCACTGGATACGACAGCCTA                       |
| S-hsa-miR-26b-5p                                                     | S: GTCGTATCCAGTGCAGGGTCCGAGGTATTCGCACTGGATACGACACCTAT                       |
| S-hsa-miR-185-5p                                                     | S: GTCGTATCCAGTGCAGGGTCCGAGGTATTCGCACTGGATACGACTCAGGA                       |
| S-hsa-miR-203a-3p                                                    | S: GTCGTATCCAGTGCAGGGTCCGAGGTATTCGCACTGGATACGACCTAGTG                       |
| F-hsa-miR-26a-5p                                                     | F: GCGTGCTTCAAGTAATCCAGGA                                                   |
| F-hsa-miR-26b-5p                                                     | F: CCGCGCTTCAAGTAATTCAGG                                                    |
| F-hsa-miR-185-5p                                                     | F: CCGCTGGAGAGAAAGGCAGT                                                     |
| F-hsa-miR-203a-3p                                                    | F: CCGCCGTGAAATGTTTAGGAC                                                    |
| Universal Reverse                                                    | R: GTGCAGGGTCCGAGGT                                                         |

**Table S2.** Killer Immunoglobulin-like receptor (KIR) expression profiles in the NK-92 cell line.

|        | Killer-cell immunoglobulin-like receptor (KIR) |          |          |          |          |          |          |          |          |          |          |          |          |          |
|--------|------------------------------------------------|----------|----------|----------|----------|----------|----------|----------|----------|----------|----------|----------|----------|----------|
|        | 2DL<br>1                                       | 2DL<br>2 | 2DL<br>3 | 2DL<br>4 | 2DL<br>5 | 2DS<br>1 | 2DS<br>2 | 2DS<br>3 | 2DS<br>4 | 2DS<br>5 | 3DL<br>1 | 3DL<br>2 | 3DL<br>3 | 3DS<br>1 |
| DNA    | +                                              | +        | +        | +        | -        | -        | +        | -        | F/D      | -        | +        | +        | +        | -        |
| mRN    | -                                              | -        | -        | +        | -        | -        | -        | -        | -        | -        | +        | -        | +        | -        |
| A      |                                                |          |          |          |          |          |          |          |          |          |          |          |          |          |
| Protei | -                                              | -        | -        | +        | -        | -        | -        | -        | -        | -        | +        | -        | -        | -        |
| n      |                                                |          |          |          |          |          |          |          |          |          |          |          |          |          |

+: positive, -: negative, F: full form, D: deleted form (22 base pair deletion in KIR2DS4 exon 5)

**Table S3.** The percent sequence identity between the 3' untranslated region (3'UTR) of different KIRs\*.

|               | N  | D  | N  | D  | N  | D  | N   | D  | N  | D  | N  | D  | N  | D | N | D | S | D | S | D | S | D |  |
|---------------|----|----|----|----|----|----|-----|----|----|----|----|----|----|---|---|---|---|---|---|---|---|---|--|
| 2DL2*0010101  | 99 |    |    |    |    |    |     |    |    |    |    |    |    |   |   |   |   |   |   |   |   |   |  |
| 2DL3*0010101  | 96 | 96 |    |    |    |    |     |    |    |    |    |    |    |   |   |   |   |   |   |   |   |   |  |
| 2DL4*0010201  | 90 | 90 | 93 |    |    |    |     |    |    |    |    |    |    |   |   |   |   |   |   |   |   |   |  |
| 2DL5A*0010101 | 90 | 90 | 92 | 93 |    |    |     |    |    |    |    |    |    |   |   |   |   |   |   |   |   |   |  |
| 2DS1*0020101  | 91 | 91 | 92 | 87 | 88 |    |     |    |    |    |    |    |    |   |   |   |   |   |   |   |   |   |  |
| 2DS2*0010101  | 91 | 91 | 92 | 87 | 87 | 99 |     |    |    |    |    |    |    |   |   |   |   |   |   |   |   |   |  |
| 2DS3*00103    | 69 | 70 | 70 | 59 | 59 | 98 | 98  |    |    |    |    |    |    |   |   |   |   |   |   |   |   |   |  |
| 2DS4*0010101  | 91 | 91 | 92 | 87 | 88 | 99 | 100 | 98 |    |    |    |    |    |   |   |   |   |   |   |   |   |   |  |
| 2DS5*0020101  | 94 | 94 | 96 | 91 | 93 | 97 | 97  | 99 | 97 |    |    |    |    |   |   |   |   |   |   |   |   |   |  |
| 3DL1*0010101  | 92 | 93 | 93 | 90 | 90 | 89 | 88  | 68 | 89 | 92 |    |    |    |   |   |   |   |   |   |   |   |   |  |
| 3DL2*0010101  | 90 | 90 | 92 | 92 | 91 | 87 | 87  | 63 | 87 | 92 | 86 |    |    |   |   |   |   |   |   |   |   |   |  |
| 3DL3*00101    | 88 | 89 | 90 | 86 | 86 | 94 | 94  | 79 | 94 | 95 | 88 | 86 |    |   |   |   |   |   |   |   |   |   |  |
| 3DS1*0130101  | 97 | 98 | 96 | 90 | 90 | 96 | 96  | 96 | 96 | 95 | 92 | 90 | 93 |   |   |   |   |   |   |   |   |   |  |

All allelic 3'-UTR sequences of the KIR genes used for analysis were retrieved from a repository of the IPD-KIR Database (<https://www.ebi.ac.uk/ipd/kir>).

**Table S4.** Computational prediction of three candidate miRNAs binding on 3'UTR of 14 KIR genes.

| KIRs          | mfe (kcal/mol) <sup>a</sup> |             |             |
|---------------|-----------------------------|-------------|-------------|
|               | miR-26a-5p                  | miR-26b-5p  | miR-185-5p  |
| 2DL1*0020101  | 18.7/-24.0                  | -16.1/-20.9 | -25.2       |
| 2DL2*0010101  | -19.0/-24.0                 | -16.4/-20.9 | -25.2       |
| 2DL3*0010101  | -18.7/-24.0                 | -16.1/-20.9 | -19.8/-25.2 |
| 2DL4*0010201  | -18.7/-24.0                 | -16.1/-20.9 | -22.5/-25.2 |
| 2DL5A*0010101 | -18.7/-24.0                 | -16.1/-20.9 | -25.2       |
| 2DS1*0020101  | -18.7                       | -16.1       | -25.2       |
| 2DS2*0010101  | -18.7                       | -16.1       | -25.2       |
| 2DS3*0010301  | -18.7/-24.0                 | -16.1/-20.9 | -25.2       |
| 2DS4*0010101  | -18.7                       | -16.1       | -25.2       |
| 2DS5*0020101  | -18.7/-24.0                 | -16.1/-20.9 | -25.2       |
| 3DL1*0010101  | -19.0/-24.0                 | -16.4/-20.9 | -25.2       |
| 3DL2*0010101  | -17.9/-23.9                 | -15.0/-21.0 | -25.2       |
| 3DL3*00101    | -18.7//24.0                 | -16.1/-20.9 | 21.4/-25.2  |
| 3DS1*0130101  | -19.0/-24.0                 | -16.4/-20.9 | -25.2       |

<sup>a</sup> minimum free energy (mfe) of miRNA:mRNA duplex was calculated using RNAhybrid.

**Table S5.** Target genes for miR-26a-5p, -26b-5p and -185-5p.

| miRNA               | Target gene | Reference sequence                                                                            | Gene name                                                                                 | Pathway                        |
|---------------------|-------------|-----------------------------------------------------------------------------------------------|-------------------------------------------------------------------------------------------|--------------------------------|
| miR-26a/b-5p        | JUN         | NM_002228                                                                                     | Jun oncogene                                                                              | Proapoptotic                   |
|                     | BAX         | NM_004324                                                                                     | BCL2-associated X protein                                                                 | Proapoptotic                   |
|                     | BIRC2       | NM_001166                                                                                     | Baculoviral IAP repeat-containing 2                                                       | Apoptosis                      |
|                     | BIRC3       | NM_182962                                                                                     | Baculoviral IAP repeat-containing 3                                                       | Apoptosis                      |
|                     | XIAP        | NM_001167                                                                                     | X-linked inhibitor of apoptosis                                                           | Apoptosis                      |
|                     | MCL1        | NM_021960                                                                                     | Myeloid cell leukemia sequence 1                                                          | Antiapoptotic                  |
|                     | BID         | NM_001196                                                                                     | BH3 interacting domain death agonist                                                      | Proapoptotic                   |
|                     | CYCS        | NM_018947                                                                                     | Cytochrome c, somatic                                                                     | Proapoptotic                   |
|                     | APAF1       | NM_001160                                                                                     | Apoptotic peptidase activating factor 1                                                   | Proapoptotic                   |
|                     | TNFRSF10A   | NM_003844                                                                                     | Tumor necrosis factor receptor superfamily, member 10a                                    | Apoptosis                      |
|                     | TNFRSF11B   | NM_002546                                                                                     | Tumor necrosis factor receptor superfamily, member 11b                                    | Apoptosis                      |
|                     | TNFSF10     | NM_003810                                                                                     | TNFSF10 tumor necrosis factor (ligand) superfamily, member 10                             | Apoptosis                      |
| miR-185-5p          | Akt1        | NM_005163                                                                                     | v-akt murine thymoma viral oncogene homolog 1                                             | Cell survival                  |
|                     | IKBKB       | NM_001556                                                                                     | Inhibitor of kappa light polypeptide gene enhancer in B-cells, kinase beta                | Cell survival                  |
|                     | IKBKE       | NM_014002                                                                                     | Inhibitor of kappa light polypeptide gene enhancer in B-cells, kinase epsilon             | Cell survival                  |
|                     | IKBKG       | NM_003639                                                                                     | Inhibitor of kappa light polypeptide gene enhancer in B-cells, kinase gamma               | Cell survival                  |
|                     | PPP2CA      | NM_002715                                                                                     | Protein phosphatase 2, catalytic subunit, alpha isozyme                                   | Apoptosis                      |
|                     | PPP2CB      | NM_004156                                                                                     | Protein phosphatase 2, catalytic subunit, beta isozyme                                    | Apoptosis                      |
|                     | CAPN11      | NM_007058                                                                                     | Calpain 11                                                                                | Apoptosis                      |
|                     | CAPN7       | NM_014296                                                                                     | Calpain 7                                                                                 | Apoptosis                      |
|                     | CAPNS1      | NM_001749                                                                                     | Calpain, small subunit 1                                                                  | Apoptosis                      |
|                     | MAP2K4      | NM_003010                                                                                     | Mitogen-activated protein kinase kinase 4                                                 | Cell survival                  |
|                     | MAPK3       | NM_002746                                                                                     | Mitogen-activated protein kinase 3                                                        | Cell survival                  |
|                     | E2F1        | NM_005225                                                                                     | E2F transcription factor 1                                                                | Proapoptotic                   |
|                     | RHBDD1      | NM_032276                                                                                     | Rhomboid domain containing 1                                                              | Antiapoptotic                  |
|                     | CIAPIN1     | NM_020313                                                                                     | Cytokine induced apoptosis inhibitor 1                                                    | Apoptosis                      |
|                     | TNF         | NM_000594                                                                                     | Tumor necrosis factor                                                                     | Apoptosis                      |
|                     | NAIP        | AK124511                                                                                      | NLR family, apoptosis inhibitory protein                                                  | Apoptosis                      |
|                     | BCL2L1      | NM_001191                                                                                     | BCL2-like 1                                                                               | Proapoptotic/<br>Antiapoptotic |
|                     | BIK         | NM_001197                                                                                     | BCL2-interacting killer (apoptosis-inducing)                                              | Proapoptotic                   |
|                     | BNIP3       | NM_004052                                                                                     | BCL2/adenovirus E1B 19kDa interacting protein 3                                           | Proapoptotic                   |
|                     | BCL2L14     | NM_138722                                                                                     | BCL2-like 14 (apoptosis facilitator)                                                      | Proapoptotic                   |
|                     | BBC3        | NM_001127240                                                                                  | BCL2 binding component 3                                                                  | Antiapoptotic                  |
|                     | TNFRSF10B   | NM_003842                                                                                     | Tumor necrosis factor receptor superfamily, member 10b                                    | Apoptotic                      |
|                     | FAS         | NM_000043                                                                                     | Fas cell surface death receptor                                                           | Apoptotic                      |
| TNFRSF10C           | NM_003841   | Tumor necrosis factor receptor superfamily, member 10c, decoy without an intracellular domain | Apoptotic                                                                                 |                                |
| FADD                | NM_003824   | Fas (TNFRSF6)-associated via death domain                                                     | Apoptotic                                                                                 |                                |
| miR-26a/b-5p+185-5p | BOD1        | NM_138369                                                                                     | Biorientation of chromosomes in cell division 1                                           | Proapoptotic                   |
|                     | BCL2        | NM_000633                                                                                     | B-cell CLL/lymphoma 2                                                                     | Proapoptotic/<br>Antiapoptotic |
|                     | PIM1        | NM_001001852                                                                                  | Pim-1 oncogene                                                                            | Cell survival                  |
|                     | PIM2        | NM_006875                                                                                     | Pim-2 oncogene                                                                            | Cell survival                  |
|                     | PIM3        | NM_001001852                                                                                  | Pim-3 oncogene                                                                            | Cell survival                  |
|                     | TNFRSF10D   | NM_003840                                                                                     | Tumor necrosis factor receptor superfamily, member 10d, decoy with truncated death domain | Apoptotic                      |

|                     |           |                      |                                                                                         |               |
|---------------------|-----------|----------------------|-----------------------------------------------------------------------------------------|---------------|
| miR-26a/b-5p+185-5p | PAK1      | NM_002576            | P21 protein (Cdc42/Rac)-activated kinase 1                                              | Cell survival |
|                     | PAK1IP1   | NM_017906            | PAK1 interacting protein 1                                                              | Cell survival |
|                     | PAK2      | NM_002577            | P21 protein (Cdc42/Rac)-activated kinase 2                                              | Cell survival |
|                     | PAK3      | NM_002578            | P21 protein (Cdc42/Rac)-activated kinase 3                                              | Cell survival |
|                     | PAK4      | NM_005884            | P21 protein (Cdc42/Rac)-activated kinase 4                                              | Cell survival |
|                     | PAK6      | NM_020168            | P21 protein (Cdc42/Rac)-activated kinase 6                                              | Cell survival |
|                     | PAK7      | NM_020341            | P21 protein (Cdc42/Rac)-activated kinase 7                                              | Cell survival |
|                     | BTRC      | NM_003939            | Beta-transducin repeat containing                                                       | Cell cycle    |
|                     | FOXO3     | NM_001455            | Forkhead box O3                                                                         | Apoptosis     |
|                     | TP53      | NM_000546            | Tumor protein p53                                                                       | Apoptosis     |
|                     | TP63      | NM_003722            | Tumor protein p63                                                                       | Apoptosis     |
|                     | UCHL1     | NM_004181            | Ubiquitin carboxyl-terminal esterase L1 (ubiquitin thiolesterase)                       | Apoptosis     |
|                     | HIF1A     | NM_001530            | Hypoxia-inducible factor 1, alpha subunit (basic helix-loop-helix transcription factor) | Proapoptotic  |
|                     | HIF1AN    | NM_017902            | Hypoxia-inducible factor 1, alpha subunit inhibitor                                     | Proapoptotic  |
| SMAD1               | NM_005900 | SMAD family member 1 | Proapoptotic                                                                            |               |
